# Supplementary material for: Improving the intrinsic electrocatalytic hydrogen evolution activity of few-layer NiPS3 by cobalt doping
Source: Royal Society of Chemistry journal article supplement (doi:10.1039/c7cc03173d), 2017-01-01
Supplement: c7cc03173d1.pdf [file c7cc03173d1.pdf]

## Electronic Supplementary Information

### Improving the intrinsic electrocatalytic hydrogen evolution activity of few-layer NiPS<sub>3</sub> by cobalt doping

Kai Li,<sup>a</sup> Dmitrii Rakov,<sup>a</sup> Wei Zhang<sup>\*b</sup> and Ping Xu<sup>\*a</sup>

<sup>a</sup> MIIT Key Laboratory of Critical Materials Technology for New Energy Conversion and Storage, School of Chemistry and Chemical Engineering, Harbin Institute of Technology, Harbin 150001, China. Email : p xu@hit.edu.cn

<sup>b</sup> Chongqing Institute of Green and Intelligent Technology, Chinese Academy of Sciences, Chongqing, China. Email: andyzhangwei@163.com

## Experimental Section

**Synthesis of  $Ni_{1-x}Co_xPS_3$  NSs.** Bulk  $Ni_{1-x}Co_xPS_3$  ( $x=0, 0.03, 0.05, 0.07$  and  $0.09$ ) samples were prepared by solid state reaction with stoichiometric amounts (total of 2 gram) of Ni, Co, P and S powders. The elemental powders were mixed thoroughly using a mechanical mixer for at least 2 h. The mixture was then sealed into quartz tube under vacuum of  $2.5 \times 10^{-3}$  bar. After that, the sealed samples were heated from room temperature to  $700$  °C with a heating rate of  $1$  °C/min. After maintained at  $700$  °C for 5 d, the tubes were cooled down to room temperature, and the synthesized  $Ni_{1-x}Co_xPS_3$  bulk black powders were obtained.  $Ni_{1-x}Co_xPS_3$  NSs were obtained from an ultrasonication-assisted exfoliation process. In a typical procedure, 0.8 g bulk  $Ni_{1-x}Co_xPS_3$  was added to a 20 mL glass vial containing 15 mL N,N-dimethyl formamide (DMF). The above solution was subject to ultrasonication for 48 h to get the exfoliated  $Ni_{1-x}Co_xPS_3$  NSs.

**Characterization.** XRD measurements were performed on a Rigaku D/max 2500 X-ray diffractometer using Cu K $\alpha$  radiation. A JEOL ARM 200F transmission electron microscope (JEOL, Tokyo) and field-emission gun (FEG) scanning electron microscope (JEOL 6500 SEM) were used to characterize the morphology of the synthesized materials. The point resolution of the HRTEM was  $\sim 0.19$  nm. The thickness of  $Ni_{1-x}Fe_xPS_3$  NSs was analyzed by atomic force microscopy (AFM) on a Bruker DI MultiMode-8 system. X-ray photoelectron spectra were recorded on an ESCALAB MKII using an Al K $\alpha$  excitation source. Raman spectra were collected on a Renishaw inVia confocal micro-Raman spectroscopy system using a TE air-cooled  $576 \times 400$  CCD array with a 532 nm excitation laser. The resolution of the Raman spectrometer was  $\sim 0.9$   $cm^{-1}$ , and the diameter of the incident light spot was  $\sim 1$   $\mu m$ . For electrical conductivity measurement,  $Ni_{1-x}Co_xPS_3$  bulk materials were compressed into a disc with a diameter of 5 mm and a thickness of 1.5 mm, under a pressure of 3 MPa and a pressure time of 3 min. Then  $I$ - $V$  curves were collected using a semiconductor analyzer (Keithley 4200 SCS) in the range of -1 to 1 V.

**Electrochemical measurements.** The exfoliated solution was centrifuged and washed with absolute ethyl alcohol to get the solid  $Ni_{1-x}Co_xPS_3$  NSs. 10 mg of  $Ni_{1-x}Co_xPS_3$  NSs were dispersed in absolute ethyl alcohol (0.5 mL) and then 10  $\mu L$  of Nafion were added. Then the solution was sonicated for about 30 min to get a uniform ink solution. 5  $\mu L$  of catalyst ink were dropcasted onto a polished glassy carbon electrode (GCE, 5 mm in diameter) for a catalyst loading of  $0.51 \pm 0.01$   $mg/cm^2$  and dried in the air. All of the electrochemical measurements were performed in 100 mL of 1M KOH aqueous solution employing a three-electrode configuration using a rotating disk electrode (RDE) operating at 1,200 RPM. A platinum wire was used as a counter electrode and an Ag/AgCl (in 3.5 M KCl solution) electrode was used as a reference electrode. All of the linear sweep scan rate were measured at 5 mV/s. Cyclic voltammograms at various scan rates (20, 40, 60, 80, 100, 120, 140, 160, and 180 mV/s) were collected in the range of 0.224–0.324 V vs. RHE. The electrochemical impedance spectroscopy (EIS) were tested at 200 mV overpotential with the frequency ranging from  $10^6$  to 0.1 Hz. To better compare the true catalytic activity of different catalysts, we used the series resistance determined from EIS experiments to correct the polarization measurements and subsequent Tafel analysis for the  $iR$  losses. All of the potentials were referenced to a reversible hydrogen electrode (RHE).

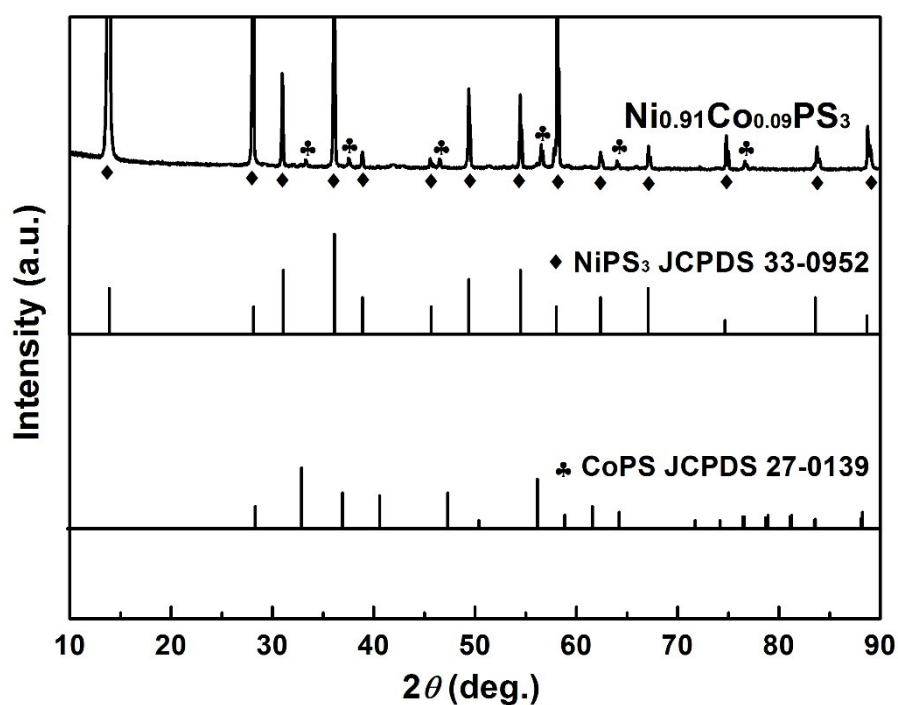

Fig. S1. Magnified XRD pattern of  $\text{Ni}_{0.91}\text{Co}_{0.09}\text{PS}_3$  sample. It can be seen that with high doping content of Co, a small amount of CoPS can be produced.

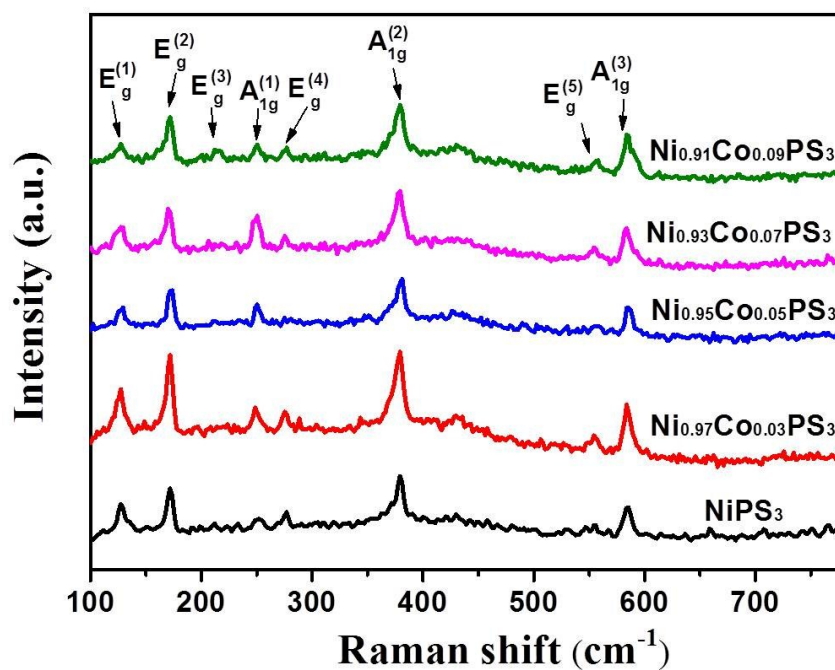

Fig. S2. Raman spectra of prepared  $\text{NiPS}_3$  and  $\text{Ni}_{1-x}\text{Co}_x\text{PS}_3$  samples.

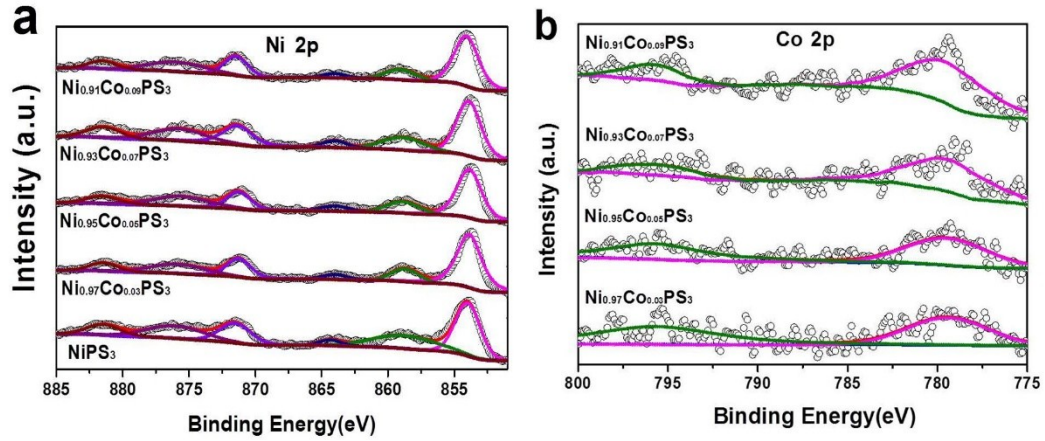

Fig. S3. XPS spectra of Ni<sub>1-x</sub>Co<sub>x</sub>PS<sub>3</sub> samples: (a) Ni 2p and (b) Co 2p.

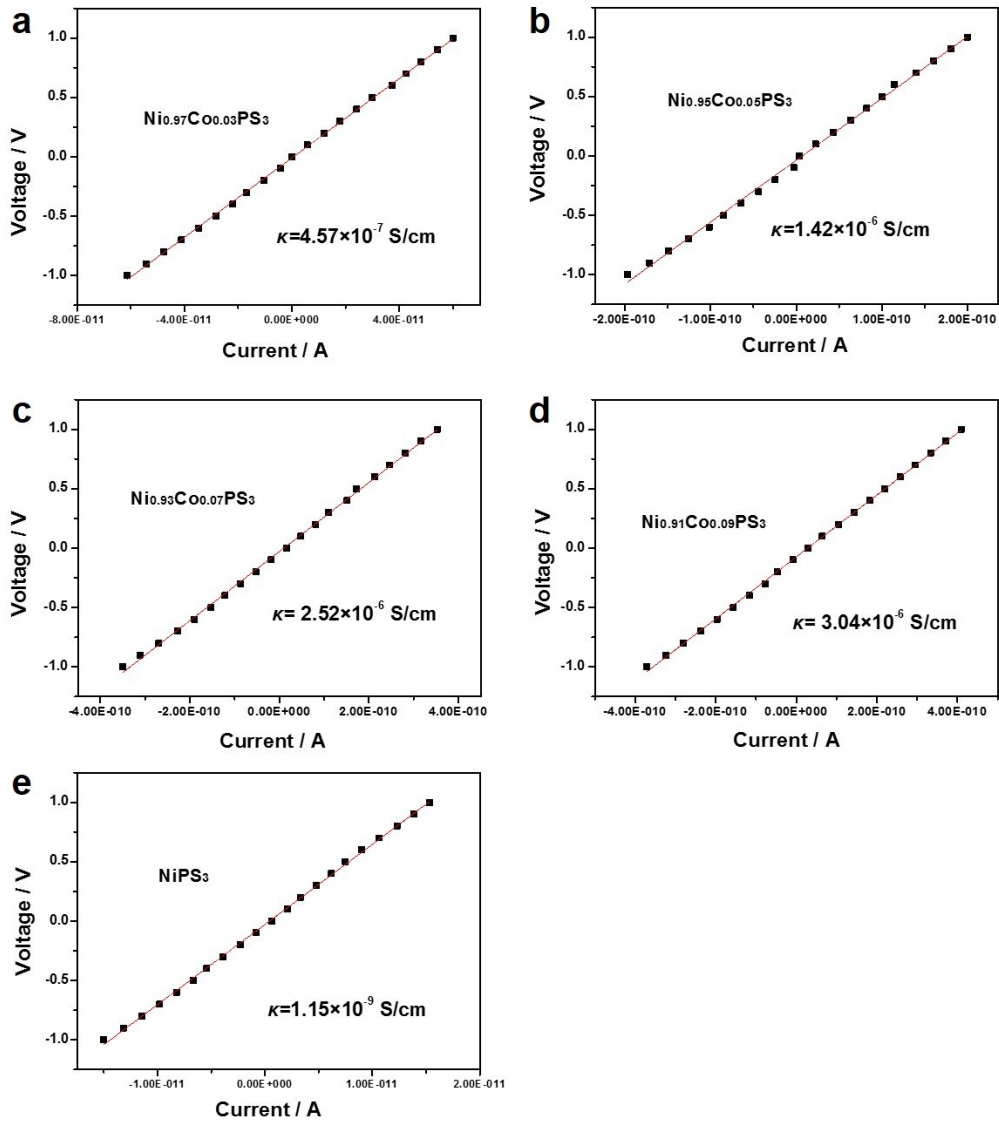

Fig. S4. Electrical conductivity of Ni<sub>1-x</sub>Co<sub>x</sub>PS<sub>3</sub> samples (a-d) and NiPS<sub>3</sub> (e).

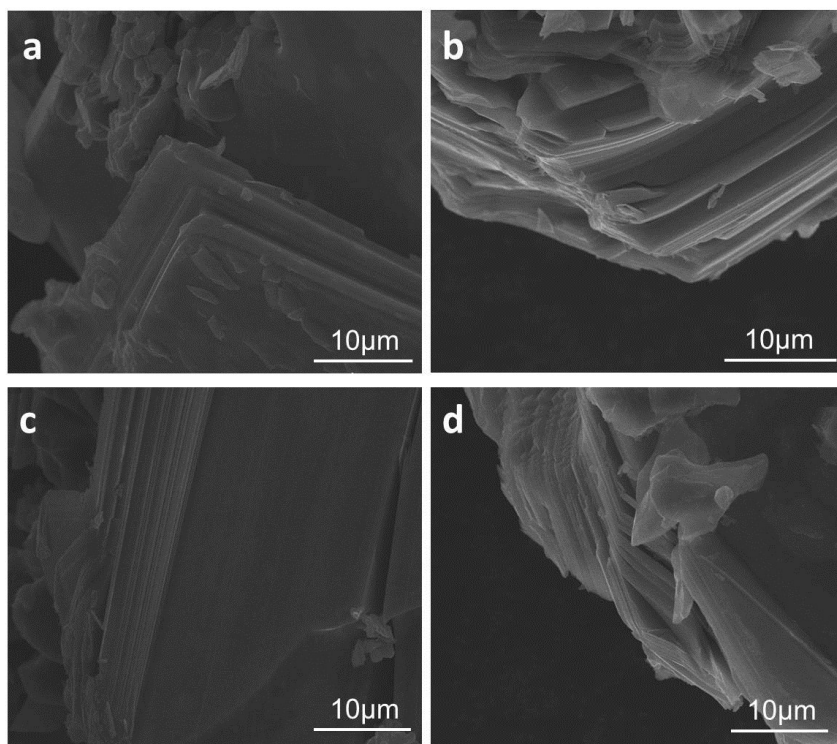

**Fig. S5.** SEM images of bulk NiPS<sub>3</sub> (a), Ni<sub>0.97</sub>Co<sub>0.03</sub>PS<sub>3</sub> (b), Ni<sub>0.93</sub>Co<sub>0.07</sub>PS<sub>3</sub> (c) and Ni<sub>0.91</sub>Co<sub>0.09</sub>PS<sub>3</sub> (d) samples.

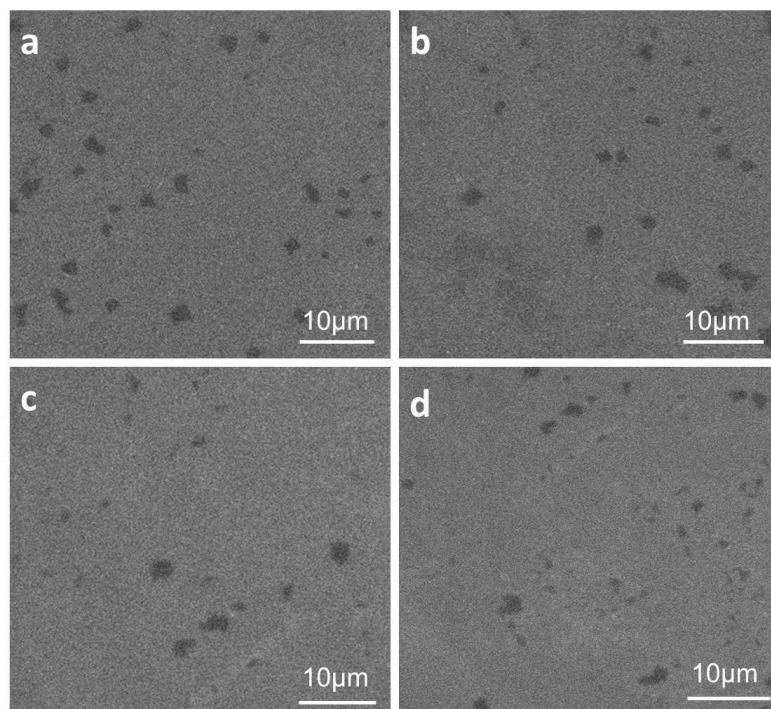

**Fig. S6.** SEM images of exfoliated bulk NiPS<sub>3</sub> (a), Ni<sub>0.97</sub>Co<sub>0.03</sub>PS<sub>3</sub> (b), Ni<sub>0.93</sub>Co<sub>0.07</sub>PS<sub>3</sub> (c) and Ni<sub>0.91</sub>Co<sub>0.09</sub>PS<sub>3</sub> (d) nanosheets.

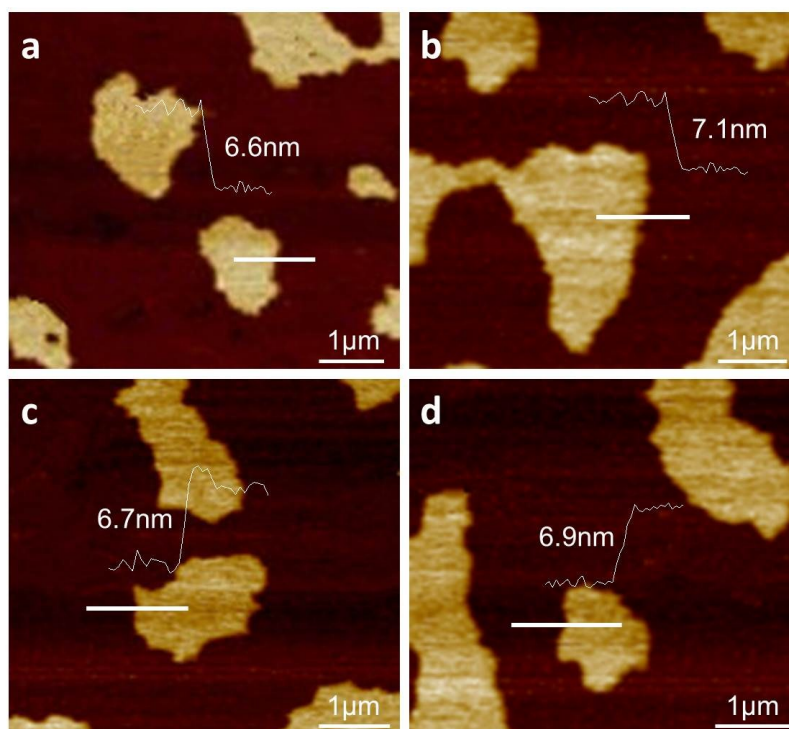

**Fig. S7.** AFM images of exfoliated bulk  $\text{NiPS}_3$  (a),  $\text{Ni}_{0.97}\text{Co}_{0.03}\text{PS}_3$  (b),  $\text{Ni}_{0.93}\text{Co}_{0.07}\text{PS}_3$  (c) and  $\text{Ni}_{0.91}\text{Co}_{0.09}\text{PS}_3$  (d) nanosheets.

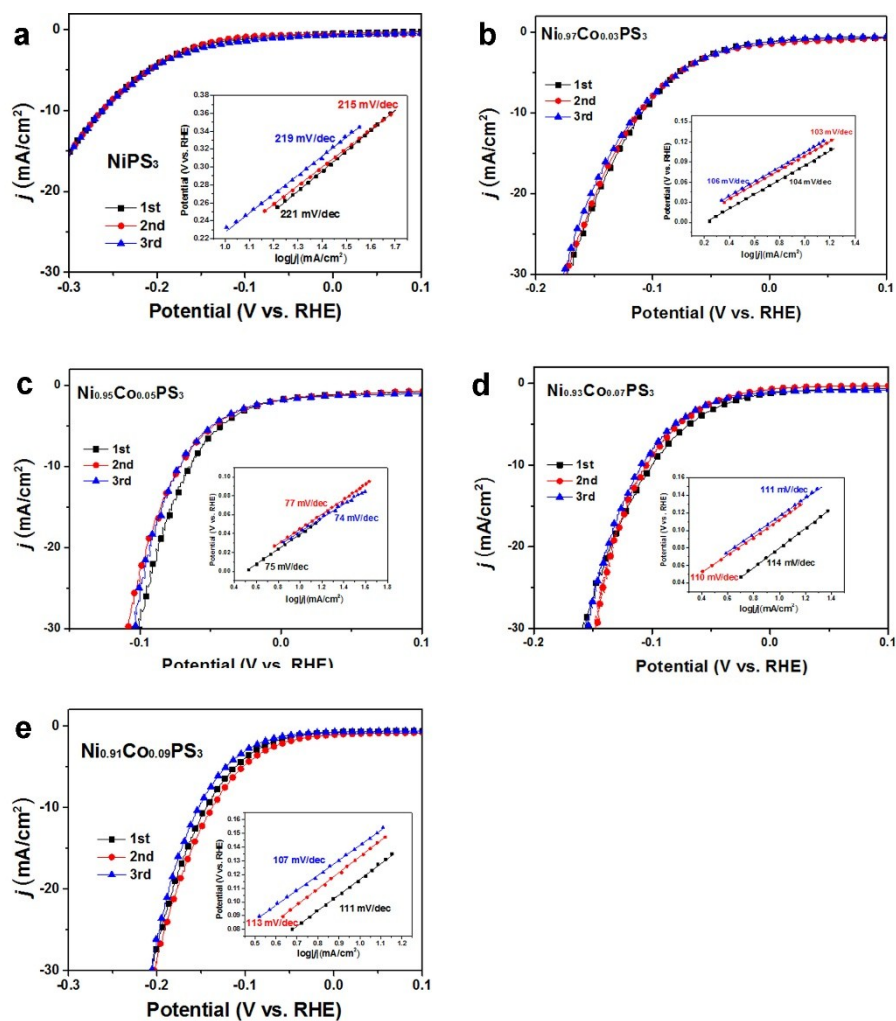

**Fig. S8.** LSV curves and Tafel plots (inset) of as-prepared NiPS<sub>3</sub>(a), Ni<sub>0.97</sub>Co<sub>0.03</sub>PS<sub>3</sub> (b), Ni<sub>0.95</sub>Co<sub>0.05</sub>PS<sub>3</sub> (c), Ni<sub>0.93</sub>Co<sub>0.07</sub>PS<sub>3</sub> (d) and Ni<sub>0.91</sub>Co<sub>0.09</sub>PS<sub>3</sub> (e) nanosheet samples from three independent batches.



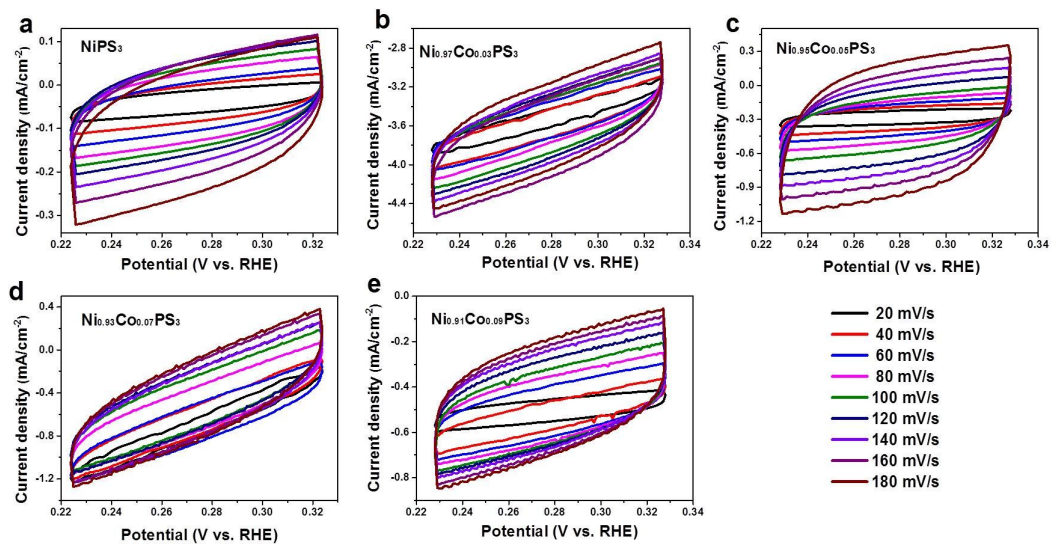

**Fig. S9.** Cyclic voltammograms of as-prepared NiPS<sub>3</sub>(a), Ni<sub>0.97</sub>Co<sub>0.03</sub>PS<sub>3</sub> (b), Ni<sub>0.95</sub>Co<sub>0.05</sub>PS<sub>3</sub> (c), Ni<sub>0.93</sub>Co<sub>0.07</sub>PS<sub>3</sub> (d) and Ni<sub>0.91</sub>Co<sub>0.09</sub>PS<sub>3</sub> (e) nanosheet samples under different scan rates.

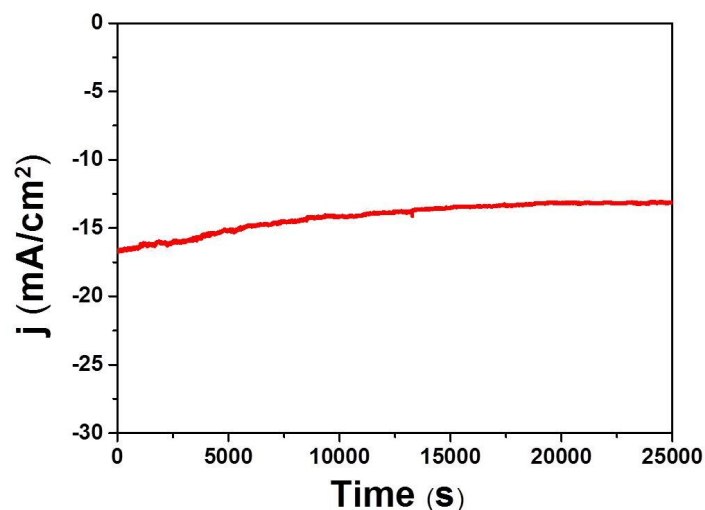

**Fig. S10.** Time-dependent current density under a constant overpotential at 180 mV of Ni<sub>0.95</sub>Co<sub>0.05</sub>PS<sub>3</sub> NSs as an HER catalyst.

**Table S1.** Ni/Co Atomic ratios of Ni<sub>1-x</sub>Co<sub>x</sub>PS<sub>3</sub> samples by XPS

| Sample              | Ni <sub>0.97</sub> Co <sub>0.03</sub> PS <sub>3</sub> | Ni <sub>0.95</sub> Co <sub>0.05</sub> PS <sub>3</sub> | Ni <sub>0.93</sub> Co <sub>0.07</sub> PS <sub>3</sub> | Ni <sub>0.91</sub> Co <sub>0.09</sub> PS <sub>3</sub> |
|---------------------|-------------------------------------------------------|-------------------------------------------------------|-------------------------------------------------------|-------------------------------------------------------|
| Ni/Co(Atomic ratio) | 30.4                                                  | 18.5                                                  | 12.6                                                  | 9.4                                                   |
